# Supplementary material for: Redefined clinical features and diagnostic criteria in autoimmune polyendocrinopathy-candidiasis-ectodermal dystrophy
Source: JCI journal article supplement (doi:10.1172/jci.insight.88782), 2016-08-17
Supplement: sd1 [file 1]

## List of Supplemental Material

1. Supplemental Table 1. Autoimmune regulator (*AIRE*) mutations and deletions detected in the American Autoimmune polyendocrinopathy-Candidiasis-Ectodermal dystrophy (APECED) patient cohort.
2. Supplemental Table 2. Summary of autoantibody positivity in the 35 American Autoimmune polyendocrinopathy-Candidiasis-Ectodermal dystrophy (APECED) patients, their frequency in patients with or without the corresponding clinical manifestations, and their association with the time to development of the corresponding clinical manifestations.
3. Supplemental Table 3. Distribution and prevalence of organ-specific non-endocrine manifestations in the 35 American Autoimmune polyendocrinopathy-Candidiasis-Ectodermal dystrophy (APECED) patients.
4. Supplemental Table 4. Distribution of clinical manifestations appearing before a diagnostic dyad in the 28 patients in whom the diagnostic criteria did not develop as their first two manifestations.
5. Supplemental Table 5. Clinical characteristics of intestinal dysfunction in the 15 children who developed it in early childhood before meeting a classic diagnostic dyad.
6. Supplemental Table 6. Distribution of the first two consecutive manifestations among the 35 American Autoimmune polyendocrinopathy-Candidiasis-Ectodermal dystrophy (APECED) patients.
7. Supplemental Table 7. Clinical characteristics of the urticarial eruption in the 22 patients who developed it in early childhood before meeting a classic diagnostic dyad.

8. Supplemental Table 8. Histological characteristics of the urticarial eruption in 3 children with Autoimmune polyendocrinopathy-Candidiasis-Ectodermal dystrophy (APECED) in whom skin biopsies were obtained.
9. Supplemental Table 9. Absolute numbers of lymphocyte subsets in the peripheral blood of Autoimmune polyendocrinopathy-Candidiasis-Ectodermal dystrophy (APECED) patients and healthy donors.
10. Supplemental Table 10. Percent of lymphocyte subsets within corresponding lymphocytes in the blood of Autoimmune polyendocrinopathy-Candidiasis-Ectodermal dystrophy (APECED) patients and healthy donors
11. Supplemental Table 11. Primers used for amplification and sequencing to identify autoimmune regulator (*AIRE*) mutations.
12. Supplemental Table 12. Second set of amplification and sequencing primers that were used for the identification of autoimmune regulator (*AIRE*) mutations.
13. Supplemental Figure 1. Geographic distribution of the birthplace of Autoimmune polyendocrinopathy-Candidiasis-Ectodermal dystrophy (APECED) patients within the United States.
14. Supplemental Figure 2. Autoantibodies against interferon-omega are highly prevalent in American Autoimmune polyendocrinopathy-Candidiasis-Ectodermal dystrophy (APECED) patients.
15. Supplemental Figure 3. Correlation between carriage of the c.769C>T allele and time to development of clinical manifestations in American Autoimmune polyendocrinopathy-Candidiasis-Ectodermal dystrophy (APECED) patients.

16. Supplemental Figure 4. Autoantibody immunoreactivity against tissue autoantigens in the American Autoimmune polyendocrinopathy-Candidiasis-Ectodermal dystrophy (APECED) cohort.
17. Supplemental Figure 5. Correlation between autoantibody immunoreactivity and the time to development of the corresponding clinical manifestations in the American Autoimmune polyendocrinopathy-Candidiasis-Ectodermal dystrophy (APECED) patients.
18. Supplemental Figure 6. Anti-cytokine autoantibody immunoreactivity in the American Autoimmune polyendocrinopathy-Candidiasis-Ectodermal dystrophy (APECED) cohort.
19. Supplemental Figure 7. Correlation between carriage of different *AIRE* mutations and the time to development of clinical manifestations in American Autoimmune polyendocrinopathy-Candidiasis-Ectodermal dystrophy (APECED) patients.
20. Supplemental Figure 8. Gating strategy and representative FACS plots of CD11c<sup>+</sup>CD11b<sup>+</sup> B cells in mouse peripheral blood.

**SUPPLEMENTAL TABLES**

**Supplemental Table 1. Autoimmune regulator (*AIRE*) mutations and deletions detected in the American Autoimmune polyendocrinopathy-Candidiasis-Ectodermal dystrophy (APECED) patient cohort.**

| <b>Coding DNA sequence</b>                                  | <b>Protein sequence</b> | <b>Number of patients</b> | <b>Percent of patients</b> | <b>Previously described</b> | <b><i>AIRE</i> exon</b> |
|-------------------------------------------------------------|-------------------------|---------------------------|----------------------------|-----------------------------|-------------------------|
| Homozygous for c.967_979del13                               | p.L323SfsX51            | 10                        | 28.6%                      | Yes                         | 8                       |
| Compound heterozygous for c.967_979del13 and c.769C>T       | p.R257X                 | 9                         | 25.7%                      | Yes                         | 6                       |
| and c.190_226del37                                          | p.S64TfsX71             | 3                         | 8.6%                       | No                          | 2                       |
| and c.1249_1250insC                                         | p.L417PfsX7             | 2                         | 5.7%                       | Yes                         | 10                      |
| and c.1616C>T                                               | p.P539L                 | 1                         | 2.9%                       | Yes                         | 14                      |
| and c.522_523ins13                                          | p.L175RfsX46            | 1                         | 2.9%                       | No                          | 4                       |
| and 1781-bp deletion of exons 1-4 and wild-type <i>AIRE</i> |                         | 1                         | 2.9%                       | No                          | 1-4                     |
| Homozygous for c.769C>T                                     | p.R257X                 | 1                         | 2.9%                       |                             |                         |
| Compound heterozygous for c.769C>T and c.789_789delC        | p.A264LfsX114           | 1                         | 2.9%                       | Yes                         | 6                       |
| Homozygous c.328delC                                        | p.R110fsX37             | 1                         | 2.9%                       | No                          | 3                       |
| Homozygous for wild-type <i>AIRE</i>                        |                         | 4                         | 11.4%                      |                             |                         |
| <b>Total</b>                                                |                         | <b>35</b>                 | <b>100%</b>                |                             |                         |

**Supplemental Table 2. Summary of autoantibody positivity in the 35 American Autoimmune polyendocrinopathy-Candidiasis-Ectodermal dystrophy (APECED) patients, their frequency in patients with or without the corresponding clinical manifestations, and their association with the time to development of the corresponding clinical manifestations.**

| <b>AAB and corresponding manifestation*</b> | <b>AAB positivity in patients with the corresponding manifestation % (n)</b> | <b>AAB positivity in patients without the corresponding manifestation % (n)</b> | <b>AAB positivity in all 35 patients % (n)**</b> | <b>Association of AAB positivity with time to development of the corresponding disease (p-value<sup>†</sup>)</b> |
|---------------------------------------------|------------------------------------------------------------------------------|---------------------------------------------------------------------------------|--------------------------------------------------|------------------------------------------------------------------------------------------------------------------|
| IL-17A with CMC                             | 40% (12/30)                                                                  | 20% (1/5)                                                                       | 37.1% (13/35)                                    | 0.3888                                                                                                           |
| IL-17F with CMC                             | 86.7% (26/30)                                                                | 80% (4/5)                                                                       | 85.7% (30/35)                                    | 0.0382                                                                                                           |
| IL-22 with CMC                              | 86.7% (26/30)                                                                | 80% (4/5)                                                                       | 85.7% (30/35)                                    | 0.0382                                                                                                           |
| NALP5 with HP                               | 46.9% (15/32)                                                                | 0% (0/3)                                                                        | 42.9% (15/35)                                    | 0.1953                                                                                                           |
| 21-OH with AI                               | 58.6% (17/29)                                                                | 16.7 (1/6)                                                                      | 51.4% (18/35)                                    | 0.1729                                                                                                           |
| SCC with AI                                 | 75.9% (22/29)                                                                | 33.3% (2/6)                                                                     | 68.6% (24/35)                                    | 0.1048                                                                                                           |
| 21-OH and/or SCC with AI                    | 79.3% (23/29)                                                                | 33.3% (2/6)                                                                     | 71.4% (25/35)                                    | 0.0807                                                                                                           |
| Anti-thyroglobulin and HT                   | 25% (2/8)                                                                    | 3.7% (1/27)                                                                     | 8.6% (3/35)                                      | 0.7056                                                                                                           |
| TPO and HT                                  | 25% (2/8)                                                                    | 7.4% (2/27)                                                                     | 11.4% (4/35)                                     | 0.9667                                                                                                           |
| GAD65 and DM                                | 100% (4/4)                                                                   | 51.6 (16/31)                                                                    | 57.1% (20/35)                                    | 0.5677                                                                                                           |
| IA-2 and DM                                 | 75% (3/4)                                                                    | 3.2% (1/31)                                                                     | 11.4% (4/35)                                     | <0.0001                                                                                                          |
| SCC and hypogonadism                        | 54.6% (6/11)                                                                 | 75% (18/24)                                                                     | 68.6% (24/35)                                    | 0.388                                                                                                            |
| SCC and TF                                  | 66.7 (2/3)                                                                   | 81.8% (9/11)                                                                    | 78.6% (11/14)                                    | 0.7518                                                                                                           |
| SCC and OF                                  | 75% (6/8)                                                                    | 53.9% (7/13)                                                                    | 61.9% (13/21)                                    | 0.4322                                                                                                           |
| TPH and gastritis                           | 94.4% (17/18)                                                                | 64.7% (11/17)                                                                   | 80% (28/35)                                      | 0.0956                                                                                                           |
| Intrinsic factor and B12 deficiency         | 100% (10/10)                                                                 | 24% (6/25)                                                                      | 45.7% (16/35)                                    | 0.0002                                                                                                           |
| Anti-parietal cell and B12 deficiency       | 10% (1/10)                                                                   | 0% (0/25)                                                                       | 2.9% (1/35)                                      | 0.8289                                                                                                           |
| TH and alopecia                             | 66.7% (4/6)                                                                  | 48.3% (14/29)                                                                   | 51.4% (18/35)                                    | 0.3302                                                                                                           |
| GAD65 and vitiligo                          | 53.9% (7/13)                                                                 | 59.1% (13/22)                                                                   | 57.1% (20/35)                                    | 0.6233                                                                                                           |
| GAD65 and ID                                | 57.1% (16/28)                                                                | 57.1% (4/7)                                                                     | 57.1% (20/35)                                    | 0.81                                                                                                             |
| TPH and ID                                  | 92.9% (26/28)                                                                | 28.6% (2/7)                                                                     | 80% (28/35)                                      | 0.0094                                                                                                           |
| BPIFB1 and pneumonitis                      | 85.7% (12/14)                                                                | 14.3% (3/21)                                                                    | 42.9% (15/35)                                    | 0.0003                                                                                                           |
| KCNRG and pneumonitis                       | 28.6 (4/14)                                                                  | 0% (0/21)                                                                       | 11.4% (4/35)                                     | 0.0127                                                                                                           |
| IFN- $\omega$                               | N/A                                                                          | N/A                                                                             | 97.1% (34/35)                                    | N/A                                                                                                              |

|               |     |     |               |     |
|---------------|-----|-----|---------------|-----|
| IFN- $\alpha$ | N/A | N/A | 33/35 (94.3%) | N/A |
| IFN- $\gamma$ | N/A | N/A | 0/35 (0%)     | N/A |
| IL-1 $\alpha$ | N/A | N/A | 0/35 (0%)     | N/A |
| IL-12p70      | N/A | N/A | 0/35 (0%)     | N/A |
| GM-CSF        | N/A | N/A | 0/35 (0%)     | N/A |

\* AAB, autoantibody; NALP5, NLR family and pyrin domain containing 5; 21-OH, 21-hydroxylase; SCC, side-chain cleavage enzyme; TPO, thyroid peroxidase; GAD65, glutamic acid decarboxylase 65; IA-2, tyrosine phosphatase-related islet antigen 2; TH, tyrosine hydroxylase; TPH, tryptophan hydroxylase; BPIFB1, bactericidal/permeability-increasing fold-containing B1; KCNRG, potassium channel regulator; CMC, chronic mucocutaneous candidiasis; HP, hypoparathyroidism; AI, adrenal insufficiency; HT, hypothyroidism; DM, type-1 diabetes mellitus; TF, testicular failure; POF, primary ovarian failure; ID, intestinal dysfunction; N/A, not applicable.

\*\* Assessment of AABs for ovarian failure and testicular failure were calculated in females (n=21) and males (n=14), respectively.

¶ P values were determined using log rank tests.

**Supplemental Table 3. Distribution and prevalence of organ-specific non-endocrine manifestations in the 35 American Autoimmune polyendocrinopathy-Candidiasis-Ectodermal dystrophy (APECED) patients.**

| Patient # | Clinical manifestation |           |           |                        |             |                         | Number of manifestations among the 6 non-endocrine manifestations |
|-----------|------------------------|-----------|-----------|------------------------|-------------|-------------------------|-------------------------------------------------------------------|
|           | Urticarial eryption    | Hepatitis | Gastritis | Intestinal dysfunction | Pneumonitis | Sjogren's-like syndrome |                                                                   |
| 1         | No                     | No        | Yes       | Yes                    | Yes         | Yes                     | 4                                                                 |
| 2         | Yes                    | No        | No        | No                     | Yes         | No                      | 2                                                                 |
| 3         | Yes                    | No        | No        | Yes                    | Yes         | No                      | 3                                                                 |
| 4         | Yes                    | Yes       | Yes       | Yes                    | Yes         | No                      | 5                                                                 |
| 5         | No                     | Yes       | Yes       | Yes                    | No          | Yes                     | 4                                                                 |
| 6         | No                     | No        | No        | Yes                    | No          | No                      | 1                                                                 |
| 7         | Yes                    | No        | No        | No                     | No          | No                      | 1                                                                 |
| 8         | Yes                    | Yes       | No        | No                     | Yes         | No                      | 3                                                                 |
| 9         | Yes                    | Yes       | No        | Yes                    | No          | No                      | 3                                                                 |
| 10        | Yes                    | Yes       | Yes       | Yes                    | No          | Yes                     | 5                                                                 |
| 11        | Yes                    | No        | Yes       | Yes                    | Yes         | Yes                     | 5                                                                 |
| 12        | Yes                    | No        | Yes       | Yes                    | No          | No                      | 3                                                                 |
| 13        | Yes                    | Yes       | Yes       | Yes                    | Yes         | Yes                     | 6                                                                 |
| 14        | No                     | No        | No        | Yes                    | No          | No                      | 1                                                                 |
| 15        | No                     | No        | No        | No                     | No          | No                      | 0                                                                 |
| 16        | Yes                    | No        | No        | Yes                    | No          | No                      | 2                                                                 |
| 17        | Yes                    | Yes       | Yes       | Yes                    | Yes         | No                      | 5                                                                 |
| 18        | Yes                    | No        | Yes       | Yes                    | No          | Yes                     | 4                                                                 |
| 19        | No                     | No        | No        | Yes                    | No          | Yes                     | 2                                                                 |
| 20        | Yes                    | Yes       | Yes       | Yes                    | Yes         | Yes                     | 6                                                                 |
| 21        | No                     | No        | Yes       | Yes                    | No          | No                      | 2                                                                 |
| 22        | No                     | No        | No        | No                     | No          | No                      | 0                                                                 |
| 23        | No                     | No        | No        | No                     | No          | Yes                     | 1                                                                 |

|    |     |     |     |     |     |     |   |
|----|-----|-----|-----|-----|-----|-----|---|
| 24 | No  | Yes | Yes | Yes | No  | No  | 3 |
| 25 | Yes | Yes | Yes | Yes | Yes | Yes | 6 |
| 26 | Yes | No  | Yes | Yes | No  | No  | 3 |
| 27 | Yes | Yes | No  | Yes | Yes | No  | 4 |
| 28 | Yes | Yes | No  | Yes | No  | Yes | 4 |
| 29 | Yes | Yes | Yes | Yes | Yes | Yes | 6 |
| 30 | Yes | Yes | No  | Yes | No  | No  | 3 |
| 31 | No  | No  | Yes | Yes | Yes | Yes | 4 |
| 32 | Yes | Yes | Yes | Yes | Yes | Yes | 6 |
| 33 | No  | No  | No  | No  | No  | No  | 0 |
| 34 | Yes | No  | No  | Yes | No  | Yes | 3 |
| 35 | Yes | No  | No  | Yes | No  | No  | 2 |

---

**Supplemental Table 4. Distribution of clinical manifestations appearing before a diagnostic dyad in the 28 patients in whom the diagnostic criteria did not develop as their first two manifestations.**

| <b>Clinical Manifestation</b> | <b>Number of patients</b> | <b>Percent of patients</b> |
|-------------------------------|---------------------------|----------------------------|
| Urticarial eruption           | 22                        | 78.6%                      |
| Intestinal dysfunction        | 15                        | 53.6%                      |
| Enamel hypoplasia             | 12                        | 42.9%                      |
| Sjögren's-like syndrome       | 7                         | 25%                        |
| Pneumonitis                   | 7                         | 25%                        |
| Keratoconjunctivitis          | 4                         | 14.3%                      |
| Hepatitis                     | 4                         | 14.3%                      |
| Nail dystrophy                | 4                         | 14.3%                      |
| Vitiligo                      | 2                         | 7.1%                       |
| Hypothyroidism                | 2                         | 7.1%                       |
| Alopecia                      | 2                         | 7.1%                       |
| Gastritis                     | 1                         | 3.6%                       |
| Growth hormone deficiency     | 1                         | 3.6%                       |
| Type-1 diabetes               | 1                         | 3.6%                       |
| Hypertension                  | 1                         | 3.6%                       |

**Supplemental Table 5. Clinical characteristics of intestinal dysfunction in the 15 children who developed it in early childhood before meeting a classic diagnostic dyad.**

| <b>DEMOGRAPHICS</b>                              |             |                                  |            |
|--------------------------------------------------|-------------|----------------------------------|------------|
| <b>Age (years)</b>                               |             | <b>Gender</b>                    |            |
| Mean                                             | 1.62        | Female                           | 9/15 (60%) |
| Range                                            | 0.17 – 5    | Male                             | 6/15 (40%) |
| <b>TYPE OF INTESTINAL DYSFUNCTION</b>            |             |                                  |            |
| Chronic diarrhea                                 |             | 8/15 (53.3%)                     |            |
| Chronic constipation                             |             | 2/15 (13.3%)                     |            |
| Alternating pattern of both                      |             | 5/15 (33.3%)                     |            |
| <b>ASSOCIATED SYMPTOMS</b>                       |             |                                  |            |
| Abdominal cramping/pain                          |             | 12/15 (80%)                      |            |
| Abdominal bloating/distention                    |             | 11/15 (73.3%)                    |            |
| Floating/"greasy" stool                          |             | 11/15 (73.3%)                    |            |
| Foul-smelling flatulence                         |             | 11/15 (73.3%)                    |            |
| <b>DURATION OF SYMPTOMS</b>                      |             |                                  |            |
| 1-5 years                                        |             | 3/15 (20%)                       |            |
| >5 years                                         |             | 12/15 (80%)                      |            |
| <b>MAXIMAL NUMBER OF BOWEL MOVEMENTS PER DAY</b> |             |                                  |            |
| <b>Chronic diarrhea (n=8)</b>                    |             | <b>Alternating pattern (n=5)</b> |            |
| 3-4                                              | 1/8 (12.5%) | 3-4                              | 2/5 (40%)  |
| 5-10                                             | 3/8 (37.5%) | 5-10                             | 2/5 (40%)  |
| >10                                              | 4/8 (50%)   | >10                              | 1/5 (20%)  |

**Supplemental Table 6. Distribution of the first two consecutive manifestations among the 35 American Autoimmune polyendocrinopathy-Candidiasis-Ectodermal dystrophy (APECED) patients.**

| <b>First two consecutive clinical manifestations</b> | <b>Number of patients</b> | <b>Percent of patients</b> |
|------------------------------------------------------|---------------------------|----------------------------|
| CMC and hypoparathyroidism                           | 7                         | 20%                        |
| Urticarial eruption and CMC                          | 6                         | 17.1%                      |
| CMC and intestinal dysfunction                       | 3                         | 8.6%                       |
| Urticarial eruption and hypoparathyroidism           | 2                         | 5.7%                       |
| Urticarial eruption and keratoconjunctivitis         | 2                         | 5.7%                       |
| Urticarial eruption and intestinal dysfunction       | 2                         | 5.7%                       |
| CMC and nail dystrophy                               | 2                         | 5.7%                       |
| Enamel hypoplasia and hypoparathyroidism             | 2                         | 5.7%                       |
| Urticarial eruption and enamel hypoplasia            | 1                         | 2.9%                       |
| Urticarial eruption and adrenal insufficiency        | 1                         | 2.9%                       |
| Urticarial eruption and pneumonitis                  | 1                         | 2.9%                       |
| Hypertension and intestinal dysfunction              | 1                         | 2.9%                       |
| CMC and Sjögren's-like syndrome                      | 1                         | 2.9%                       |
| CMC and enamel hypoplasia                            | 1                         | 2.9%                       |
| Hypoparathyroidism and hypothyroidism                | 1                         | 2.9%                       |
| Intestinal dysfunction and Sjögren's-like syndrome   | 1                         | 2.9%                       |
| Alopecia and nail dystrophy                          | 1                         | 2.9%                       |
| Within the classic triad                             | 7                         | 20%                        |
| Within the combined classic and adjunct triads       | 25                        | 71.4%                      |

**Supplemental Table 7. Clinical characteristics of the urticarial eruption in the 22 patients who developed it in early childhood before meeting a classic diagnostic dyad.**

| <b>DEMOGRAPHICS</b>        |               |                                     |               |
|----------------------------|---------------|-------------------------------------|---------------|
| <b>Age</b>                 |               | <b>Gender</b>                       |               |
| Mean                       | 12 months     | Female                              | 16/22 (72.7%) |
| Range                      | 3-36 months   | Male                                | 6/22 (27.3%)  |
| <b>APPEARANCE</b>          |               |                                     |               |
| <b>Type of rash</b>        |               | <b>Number of lesions</b>            |               |
| Macular                    | 7/22 (31.8%)  | <10                                 | 1/22 (4.5%)   |
| Papular                    | 5/22 (22.7%)  | >10                                 | 21/22 (95.5%) |
| Maculopapular              | 10/22 (45.5%) |                                     |               |
| <b>Coloration</b>          |               | <b>Grouped or individual</b>        |               |
| Pink                       | 6/22 (27.3%)  | Grouped                             | 7/22 (31.8%)  |
| Red                        | 6/22 (27.3%)  | Individual                          | 7/22 (31.8%)  |
| Mixed                      | 10/22 (45.5%) | Mixed                               | 8/22 (36.4%)  |
| <b>Blanching rash</b>      |               |                                     |               |
| Yes                        | 6/22 (27.3%)  |                                     |               |
| No                         | 16/22 (72.7%) |                                     |               |
| <b>ASSOCIATED SYMPTOMS</b> |               |                                     |               |
| Fever                      | 5/22 (22.7%)  | Irritability                        | 4/22 (18.2%)  |
| Rigors                     | 2/22 (9.1%)   | Pruritus                            | 2/22 (9.1%)   |
| <b>AFFECTED AREAS</b>      |               |                                     |               |
| <b>First area affected</b> |               | <b>Spread from initial location</b> | 20/22 (90.9%) |
| Torso                      | 11/22 (50.0%) |                                     |               |
| Extremities                | 5/22 (22.7%)  | <b>Areas of spread</b>              |               |
| Face                       | 2/22 (9.1%)   | Torso                               | 7/20 (35%)    |
| Combined                   | 2/22 (9.1%)   | Extremities                         | 12/20 (60%)   |
| Unknown                    | 1/22 (4.5%)   | Face                                | 13/20 (65%)   |

| <b>DURATION</b>                |               |                                |              |
|--------------------------------|---------------|--------------------------------|--------------|
| <b>Duration of 1st episode</b> |               | <b>Self-limited resolution</b> | 22/22 (100%) |
| ≤ 1 week                       | 6/22 (27.3%)  |                                |              |
| 1 week - 1 month               | 6/22 (27.3%)  |                                |              |
| 1-6 months                     | 10/22 (45.5%) |                                |              |
| <b>RECURRENCE</b>              |               |                                |              |
| <b>Recurrence</b>              | 16/22 (72.7%) | <b>Duration of 2nd episode</b> |              |
|                                |               | ≤ 1 week                       | 4/16 (25.0%) |
| <b>First area affected</b>     |               | 1 week - 1 month               | 9/16 (56.3%) |
| Same as initial                | 15/16 (93.8%) | 1-6 months                     | 3/16 (18.8%) |
| Different from initial         | 1/16 (6.3%)   |                                |              |

**Supplemental Table 8. Histological characteristics of the urticarial eruption in 3 children with Autoimmune polyendocrinopathy-Candidiasis-Ectodermal dystrophy (APECED) in whom skin biopsies were obtained.**

| <b>Histological characteristic</b>        | <b>Number of biopsies</b> |
|-------------------------------------------|---------------------------|
| <b>Cellular composition</b>               |                           |
| Neutrophils                               | 3/3                       |
| Monocytes/macrophages                     | 3/3                       |
| Lymphocytes                               | 3/3                       |
| Plasma cells                              | 2/3                       |
| Eosinophils                               | 1/3                       |
| <b>Histological findings</b>              |                           |
| Karyorrhexis                              | 3/3                       |
| Vacuolarization along epidermal interface | 2/3                       |
| Basal membrane thickening                 | 1/3                       |
| Vasculitis                                | 0/3                       |
| <b>Localization of inflammation</b>       |                           |
| Superficial                               | 3/3                       |
| Perivascular                              | 3/3                       |
| Interstitial                              | 3/3                       |
| Panniculitis                              | 2/3                       |

**Supplemental Table 9. Absolute numbers of lymphocyte subsets in the peripheral blood of Autoimmune polyendocrinopathy-Candidiasis-Ectodermal dystrophy (APECED) patients and healthy donors.**

| Cell subset                                                                      | APECED patients (n=35 <sup>¶</sup> )           |          | Healthy donors (n=40) |          | p-value |
|----------------------------------------------------------------------------------|------------------------------------------------|----------|-----------------------|----------|---------|
|                                                                                  | Absolute number of cell subset per µl of blood |          |                       |          |         |
|                                                                                  | Mean                                           | Range    | Mean                  | Range    |         |
| CD3 <sup>+</sup> T cells                                                         | 1691.6                                         | 393-2859 | 1399.6                | 529-2536 | 0.0289* |
| CD4 <sup>+</sup> T cells                                                         | 1090.4                                         | 274-1967 | 857.2                 | 273-1808 | 0.0123* |
| Naïve CD45RA <sup>+</sup> CD62L <sup>+</sup> CD4 <sup>+</sup> T cells            | 560.1                                          | 21-1230  | 428.5                 | 99-1169  | 0.0271  |
| Central memory CD45RA <sup>-</sup> CD62L <sup>+</sup> CD4 <sup>+</sup> T cells   | 413                                            | 89-1112  | 379.7                 | 122-729  | 0.9306  |
| Effector memory CD45RA <sup>-</sup> CD62L <sup>-</sup> CD4 <sup>+</sup> T cells  | 106.7                                          | 35-252   | 111.3                 | 38-314   | 0.4610  |
| Effector CD45RA <sup>+</sup> CD62L <sup>-</sup> CD4 <sup>+</sup> T cells         | 10.6                                           | 0-120    | 7.5                   | 0-90     | 0.7882  |
| CD8 <sup>+</sup> T cells                                                         | 480.6                                          | 53-1280  | 456.5                 | 143-854  | 0.9558  |
| Naïve CD45RA <sup>+</sup> CD62L <sup>+</sup> CD8 <sup>+</sup> T cells            | 276.5                                          | 13-1038  | 241.7                 | 67-600   | 0.4082  |
| Central memory CD45RA <sup>-</sup> CD62L <sup>+</sup> CD8 <sup>+</sup> T cells   | 63.9                                           | 1-276    | 79                    | 15-202   | 0.0347  |
| Effector memory CD45RA <sup>-</sup> CD62L <sup>-</sup> CD8 <sup>+</sup> T cells  | 80.2                                           | 8-554    | 74.8                  | 15-175   | 0.4325  |
| Effector CD45RA <sup>+</sup> CD62L <sup>-</sup> CD8 <sup>+</sup> T cells         | 59.9                                           | 5-333    | 71.4                  | 11-282   | 0.2815  |
| CD4/CD8 ratio                                                                    | 3.13                                           | 0.5-14.4 | 2.16                  | 0.61-6.1 | 0.0333  |
| CD20 <sup>+</sup> B cells                                                        | 243.4                                          | 15-1216  | 179.6                 | 39-480   | 0.8113  |
| Immature CD20 <sup>+</sup> CD10 <sup>+</sup> B cells                             | 50.2                                           | 3-304    | 48.7                  | 8-170    | 0.1035  |
| Immature CD21 <sup>+</sup> CD10 <sup>+</sup> B cells                             | 34.1                                           | 0-256    | 30.7                  | 1-111    | 0.0507  |
| CD20 <sup>+</sup> IgM <sup>-</sup> CD38 <sup>hi</sup> plasmablasts               | 0.9                                            | 0-7      | 0.15                  | 0-3      | 0.025   |
| Transitional CD20 <sup>+</sup> IgM <sup>+</sup> CD10 <sup>+</sup> B cells        | 56                                             | 2-291    | 42.3                  | 6-142    | 0.3614  |
| Transitional CD20 <sup>+</sup> CD38 <sup>+</sup> CD10 <sup>+</sup> B cells       | 58.7                                           | 3-294    | 45.9                  | 5-163    | 0.3461  |
| Memory non-switched CD20 <sup>+</sup> CD27 <sup>+</sup> IgM <sup>+</sup> B cells | 14.8                                           | 2-40     | 14.7                  | 2-49     | 0.8202  |
| Memory switched CD20 <sup>+</sup> CD27 <sup>+</sup> IgM <sup>-</sup> B cells     | 13.7                                           | 0-52     | 15.3                  | 1-53     | 0.1359  |
| CD19 <sup>+</sup> CD21 <sup>lo</sup> CD38 <sup>lo</sup> B cells                  | 13.4                                           | 2.6-43.6 | 7.4                   | 1.4-46   | 0.0007  |
| NK cells                                                                         | 181.7                                          | 15-674   | 335.9                 | 121-863  | <0.0001 |
| NKT cells                                                                        | 151.8                                          | 31-582   | 127.8                 | 28-451   | 0.3590  |

\* indicates use of an unpaired t-test. Otherwise, a Mann-Whitney test was performed. <sup>¶</sup>n=35 except for B-cell analyses in which n=30.

**Supplemental Table 10. Percent of lymphocyte subsets within corresponding lymphocytes in the blood of Autoimmune polyendocrinopathy-Candidiasis-Ectodermal dystrophy (APECED) patients and healthy donors**

| Cell subset                                                                                                         | APECED patients (n=35 <sup>¶</sup> )              |           | Healthy donors (n=40) |           | p-value  |
|---------------------------------------------------------------------------------------------------------------------|---------------------------------------------------|-----------|-----------------------|-----------|----------|
|                                                                                                                     | % of cell subset within corresponding lymphocytes |           |                       |           |          |
|                                                                                                                     | Mean                                              | Range     | Mean                  | Range     |          |
| CD4 <sup>+</sup> T cells (within CD3 <sup>+</sup> T cells)                                                          | 65.3                                              | 28.2-92.2 | 61.2                  | 32.7-81.7 | 0.1236*  |
| CD8 <sup>+</sup> T cells (within CD3 <sup>+</sup> T cells)                                                          | 27.4                                              | 6.3-54.9  | 37.6                  | 15.8-66.4 | <0.0001* |
| Naive CD4 <sup>+</sup> T cells (within CD4 <sup>+</sup> T cells)                                                    | 50.1                                              | 7.7-77.6  | 43.9                  | 20.7-70.2 | 0.0868*  |
| Central memory CD4 <sup>+</sup> T cells (within CD4 <sup>+</sup> T cells)                                           | 38.1                                              | 19-67.3   | 41.9                  | 22.1-62.7 | 0.1722*  |
| Effector memory CD4 <sup>+</sup> T cells (within CD4 <sup>+</sup> T cells)                                          | 10.9                                              | 2.6-52.9  | 13.2                  | 3.9-31.1  | 0.0295   |
| Effector CD4 <sup>+</sup> T cells (within CD4 <sup>+</sup> T cells)                                                 | 0.9                                               | 0-8.4     | 1.1                   | 0-7.2     | 0.0322   |
| Naive CD8 <sup>+</sup> T cells (within CD8 <sup>+</sup> T cells)                                                    | 55.5                                              | 21.3-89.8 | 38.2                  | 0-64      | <0.0001* |
| Central memory CD8 <sup>+</sup> T cells (within CD8 <sup>+</sup> T cells)                                           | 13.5                                              | 1.9-42.1  | 12                    | 0-24.2    | 0.6365   |
| Effector memory CD8 <sup>+</sup> T cells (within CD8 <sup>+</sup> T cells)                                          | 17.4                                              | 3.1-53.4  | 39.1                  | 18.1-100  | <0.0001* |
| Effector CD8 <sup>+</sup> T cells (within CD8 <sup>+</sup> T cells)                                                 | 13.6                                              | 2-51.4    | 10.6                  | 0-30.8    | 0.4295   |
| Immature CD20 <sup>+</sup> CD10 <sup>+</sup> B cells (within CD20 <sup>+</sup> B cells)                             | 23                                                | 0.5-68.4  | 26.6                  | 14.9-44.8 | 0.0716   |
| Immature CD21 <sup>+</sup> CD10 <sup>+</sup> B cells (within CD20 <sup>+</sup> B cells)                             | 11.7                                              | 0-63.2    | 15.9                  | 2.2-39    | 0.0007   |
| CD20 <sup>+</sup> IgM <sup>-</sup> CD38 <sup>hi</sup> plasmablasts (within CD20 <sup>+</sup> B cells)               | 0.3                                               | 0-3       | 0.1                   | 0-0.9     | 0.0369   |
| Transitional CD20 <sup>+</sup> IgM <sup>+</sup> CD10 <sup>+</sup> B cells (within CD20 <sup>+</sup> B cells)        | 22.2                                              | 3-63.2    | 22.7                  | 12.7-39   | 0.8527*  |
| Transitional CD20 <sup>+</sup> CD38 <sup>+</sup> CD10 <sup>+</sup> B cells (within B cells)                         | 23.4                                              | 4.5-63.2  | 24.8                  | 10.9-44.3 | 0.2405   |
| Memory non-switched CD20 <sup>+</sup> CD27 <sup>+</sup> IgM <sup>+</sup> B cells (within CD20 <sup>+</sup> B cells) | 10.4                                              | 1.2-28.6  | 10.3                  | 1.9-43.8  | 0.9366   |
| Memory switched CD20 <sup>+</sup> CD27 <sup>+</sup> IgM <sup>-</sup> B cells (within CD20 <sup>+</sup> B cells)     | 7.1                                               | 0-21.6    | 9.1                   | 1.4-21.1  | 0.0506   |
| CD19 <sup>+</sup> CD21 <sup>lo</sup> CD38 <sup>lo</sup> B cells (within CD19 <sup>+</sup> B cells)                  | 10.5                                              | 1.9-45.5  | 4.3                   | 1-17.7    | 0.0004   |

\* indicates use of an unpaired t-test. Otherwise, a Mann-Whitney test was performed. <sup>¶</sup>n=35 except for B-cell analyses in which n=30.

**Supplemental Table 11. Primers used for amplification and sequencing to identify autoimmune regulator (*AIRE*) mutations.**

| <b>Primer ID</b>                                                                                                                                                                                                                                                                                    | <b>Primer sequence</b> |
|-----------------------------------------------------------------------------------------------------------------------------------------------------------------------------------------------------------------------------------------------------------------------------------------------------|------------------------|
| AIRE_1F                                                                                                                                                                                                                                                                                             | AGGGGCTGCCAGTGTCC      |
| AIRE_1R                                                                                                                                                                                                                                                                                             | TCCTCCTGGAACCTCCCC     |
| AIRE_2F                                                                                                                                                                                                                                                                                             | ATGATGGAGATGGGCAGG     |
| AIRE_2R                                                                                                                                                                                                                                                                                             | CAGCTGGGCTGAGCAGG      |
| AIRE_3F                                                                                                                                                                                                                                                                                             | GATCCTAAGAGGCAAAGGGG   |
| AIRE_3R                                                                                                                                                                                                                                                                                             | CTGGTCCAGTGTGTGGGTC    |
| AIRE_4F                                                                                                                                                                                                                                                                                             | GGACTACCCAGCACTGGAC    |
| AIRE_4R                                                                                                                                                                                                                                                                                             | ACAGGGTCTCAGAGGGCAG    |
| AIRE_5F                                                                                                                                                                                                                                                                                             | GGCATAGAGTATGTGCTTGGG  |
| AIRE_5R                                                                                                                                                                                                                                                                                             | GTGGTCCTCCTTCCATCTTG   |
| AIRE_6-7F                                                                                                                                                                                                                                                                                           | ACTGCCAAGGCAGGTCC      |
| AIRE_6-7R                                                                                                                                                                                                                                                                                           | AGGTAAAGGCAGAGGCAGC    |
| AIRE_8F                                                                                                                                                                                                                                                                                             | GCTGAGGTCGGGAGAGACC    |
| AIRE_8R                                                                                                                                                                                                                                                                                             | CTTCCCTCAGGGTCAGTGG    |
| AIRE_9F                                                                                                                                                                                                                                                                                             | CTGTGAAAAGACATGGTCGG   |
| AIRE_9R                                                                                                                                                                                                                                                                                             | CAGGGGACAGACGGACAG     |
| AIRE_10F                                                                                                                                                                                                                                                                                            | CACTGACTCCTGGGTGGTG    |
| AIRE_10R                                                                                                                                                                                                                                                                                            | GTGAATTCATCCGCCCC      |
| AIRE_11F                                                                                                                                                                                                                                                                                            | GGGTTTACGCTACATTTCCCC  |
| AIRE_11R                                                                                                                                                                                                                                                                                            | GGTGGGGTGTAGGGTGTG     |
| AIRE_12F                                                                                                                                                                                                                                                                                            | GAGGTGGCACTCCTGCTC     |
| AIRE_12R                                                                                                                                                                                                                                                                                            | CCCTGAGATGTGCTCCCC     |
| AIRE_13F                                                                                                                                                                                                                                                                                            | GAATTCCCATCTCAGTGTGG   |
| AIRE_13R                                                                                                                                                                                                                                                                                            | CTGAGTTTCCACGGCTCAAG   |
| AIRE_14F                                                                                                                                                                                                                                                                                            | TAACGATGGCCATGATTCTG   |
| AIRE_14R                                                                                                                                                                                                                                                                                            | GGAAGGAGGTGTCCTTCTCAG  |
| PCR cycling conditions: 94°C for 2 min, [94°C for 30s, 60°C for 30s, 72°C for 1 min](30 cycles), 4°C hold<br>*Betaine (5M)(Sigma Aldrich) was added to 1M (final) in the PCR reactions<br>Sanger sequencing cycling conditions: 96°C for 2 min, [96°C for 10s, 60°C for 4 min](30 cycles), 4°C hold |                        |

**Supplemental Table 12. Second set of amplification and sequencing primers that were used for identifying autoimmune regulator (*AIRE*) mutations.**

| Amplification primers |                                    |                                     |      |                       |       |
|-----------------------|------------------------------------|-------------------------------------|------|-----------------------|-------|
| Exons                 | F primer sequence                  | R primer sequence                   | Size | Annealing temperature | Notes |
| 1-3                   | CTGCGGGAGGCCCTGGCCCTGATTGG         | GGAGGGGGCGGTCCAGTGCTGGGTAGTC        | 1656 | 68                    | +DMSO |
| 4-5                   | GTGAAGTAGGCGGGCGGGTCTCATTTCCTTTTAC | AGCGGCCCTGCTGTGCCCTGGTCAGAT         | 1609 | 68                    | +DMSO |
| 6-7                   | ACTGGGGTGGGGGCGGGCTGGAGGAATG       | GTGGAAGGCCCGAGGGCAGCCGTCACAG        | 1657 | 68                    | +DMSO |
| 8-9                   | CGGGCTGGTGGGCGTCTGGGGGATTGTTAG     | GACCGGGCTTGGGCATGGGGGACATAGTGCT     | 1999 | 68                    | +DMSO |
| 10                    | CTAGGCTGGGCCACCCCTCCTGTCCGTCTGT    | GCCTTTCTCGCCTGGCCTCCCTCTCCTCCTGTTTC | 820  | 68                    | +DMSO |
| 11-12                 | GGGCACCGCCTTTCAGGAGACTCCCGCACTC    | GGCTGGGGGTGAGACAACCTGGAGGGGTCAGAC   | 1406 | 68                    | +DMSO |
| 13                    | GGCGGGGGTGGCATGGACCAGGCACTTT       | GGGAGGGGCCGTGTGGGGGCTCTTGTTG        | 711  | 68                    | +DMSO |
| 14                    | GCCTCGGGCCTCAGTTTCCCCACCTTTGACTTAG | GGATGAACCTTGGGGCCACCATGCTGAGTAAAATA | 916  | 68                    | +DMSO |

| Sequencing primers |                                     |       |       |                                     |       |
|--------------------|-------------------------------------|-------|-------|-------------------------------------|-------|
| Exons              | Primer sequence                     | Notes | Exons | Primer sequence                     | Notes |
| 1-2F               | CTGCGGGAGGCCCTGGCCCTGATTGG          | +DMSO | 9R    | GACCGGGCTTGGGCATGGGGGACATAGTGCT     | +DMSO |
| 2-3R               | GTAAAAGGGAAATGAGACCCGCCGCTACTTC     | +DMSO | 10R   | GCCTTTCTCGCCTGGCCTCCCTCTCCTCCTGTTTC | +DMSO |
| 4R                 | TCTGGTGGTGCAGCTTAGGCCCTTGAATGACACA  | +DMSO | 11R   | GGAGTGTGGGGTGTGGGTGGGGTGTGGTTGTG    | +DMSO |
| 5F                 | GGGGGTGGGTCTGGTCATTGGTCATGCCTTCCTAT | +DMSO | 12F   | CAAACCCACCCAAACCCACCACTCCCACTCTCCA  | +DMSO |
| 6F                 | ACTGGGGTGGGGGCGGGCTGGAGGAATG        | +DMSO | 13R   | GCTCAAGAGCAGTGGGGGCCGGCAGTCCTC      | +DMSO |
| 7R                 | CTCATTTAAACTATTACCATTGCGTATTATCAGGA | +DMSO | 14F   | GCCTCGGGCCTCAGTTTCCCCACCTTTGACTTAG  | +DMSO |
| 8F                 | GGGGAGTTCAGGTACCCAGAGATGCT          | +DMSO | 14R   | GGGGTTGGGAGGGGAATGGGGAGTGAGTGTTTCAT | +DMSO |

## SUPPLEMENTAL FIGURES

**Supplemental Figure 1**

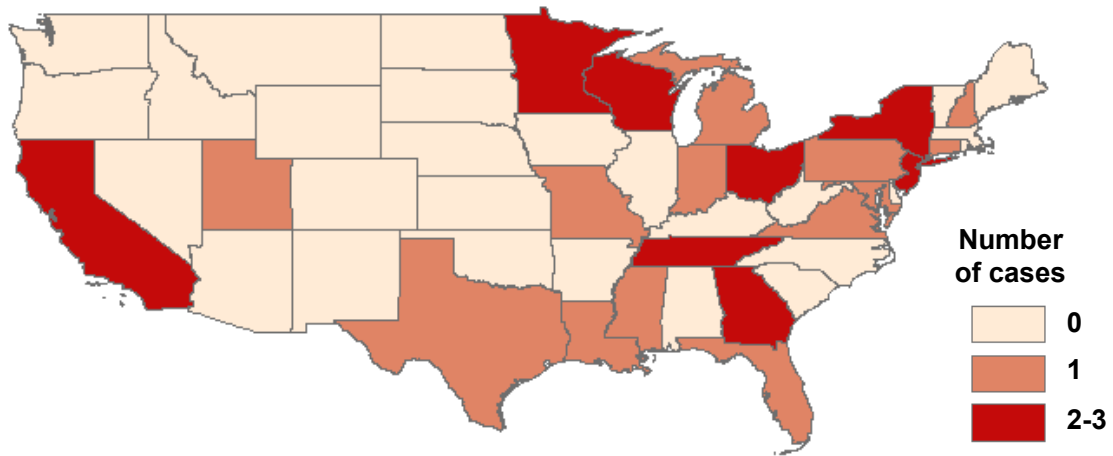

**Supplemental Figure 1. Geographic distribution of the birthplace of Autoimmune polyendocrinopathy-Candidiasis-Ectodermal dystrophy (APECED) patients within the United States.** Shown is the geographic distribution of the birthplace of the 33 US patients with enriched pockets noted in the northeast and upper midwest, parts of the south, and California.

## Supplemental Figure 2

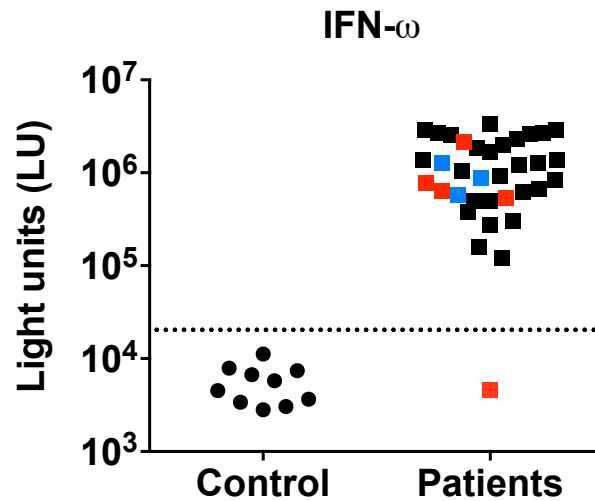

**Supplemental Figure 2. Autoantibodies against interferon-omega are highly prevalent in American Autoimmune polyendocrinopathy-Candidiasis-Ectodermal dystrophy (APECED) patients.** Shown is autoantibody immunoreactivity against interferon-omega expressed as light units (LU) using the Luciferase immunoprecipitation systems (LIPS) immunoassay. The dotted line represents the cut-off value for determining seropositivity. The 27 black squares correspond to the results obtained in the 27 APECED patients with biallelic *AIRE* mutations that include c.967\_979del13 in heterozygosity (n =17) or homozygosity (n = 10), the 5 red squares correspond to the results obtained in the 5 APECED patients without biallelic *AIRE* mutations, and the 3 blue squares correspond to the results obtained in the 3 APECED patients with biallelic *AIRE* mutations other than c.967\_979del13. n=35 patients; 10 healthy donors.

### Supplemental Figure 3

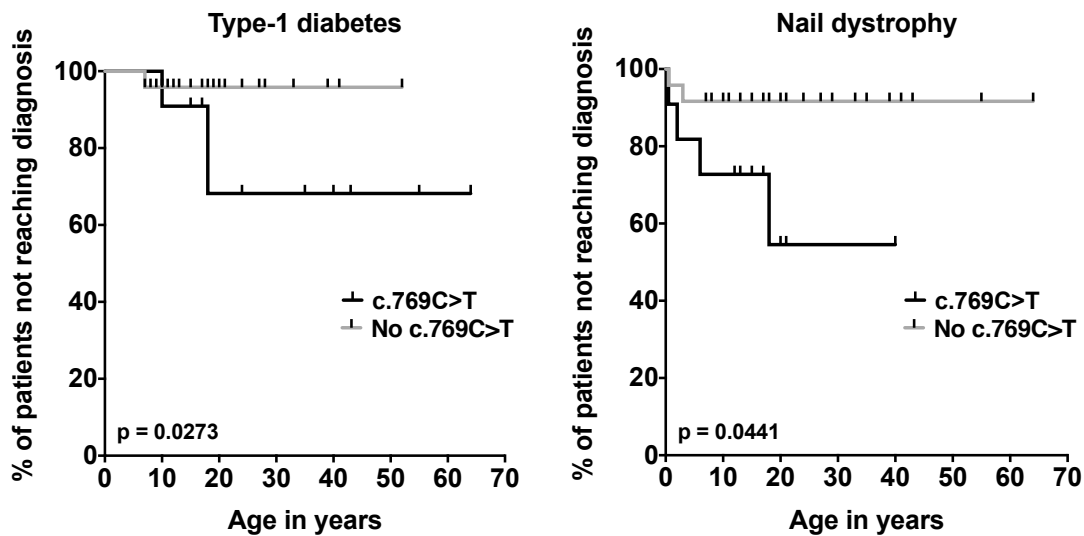

**Supplemental Figure 3. Correlation between carriage of the c.769C>T allele and time to development of clinical manifestations in American Autoimmune polyendocrinopathy-Candidiasis-Ectodermal dystrophy (APECED) patients.** Shown are Kaplan-Meier curves illustrating the correlation between carrying the c.769C>T allele and the time to development of type-1 diabetes and nail dystrophy. Analyses between carrying the c.769C>T allele and the time to development of any of the other 21 clinical manifestations did not reveal significant correlations (not shown).

## Supplemental Figure 4

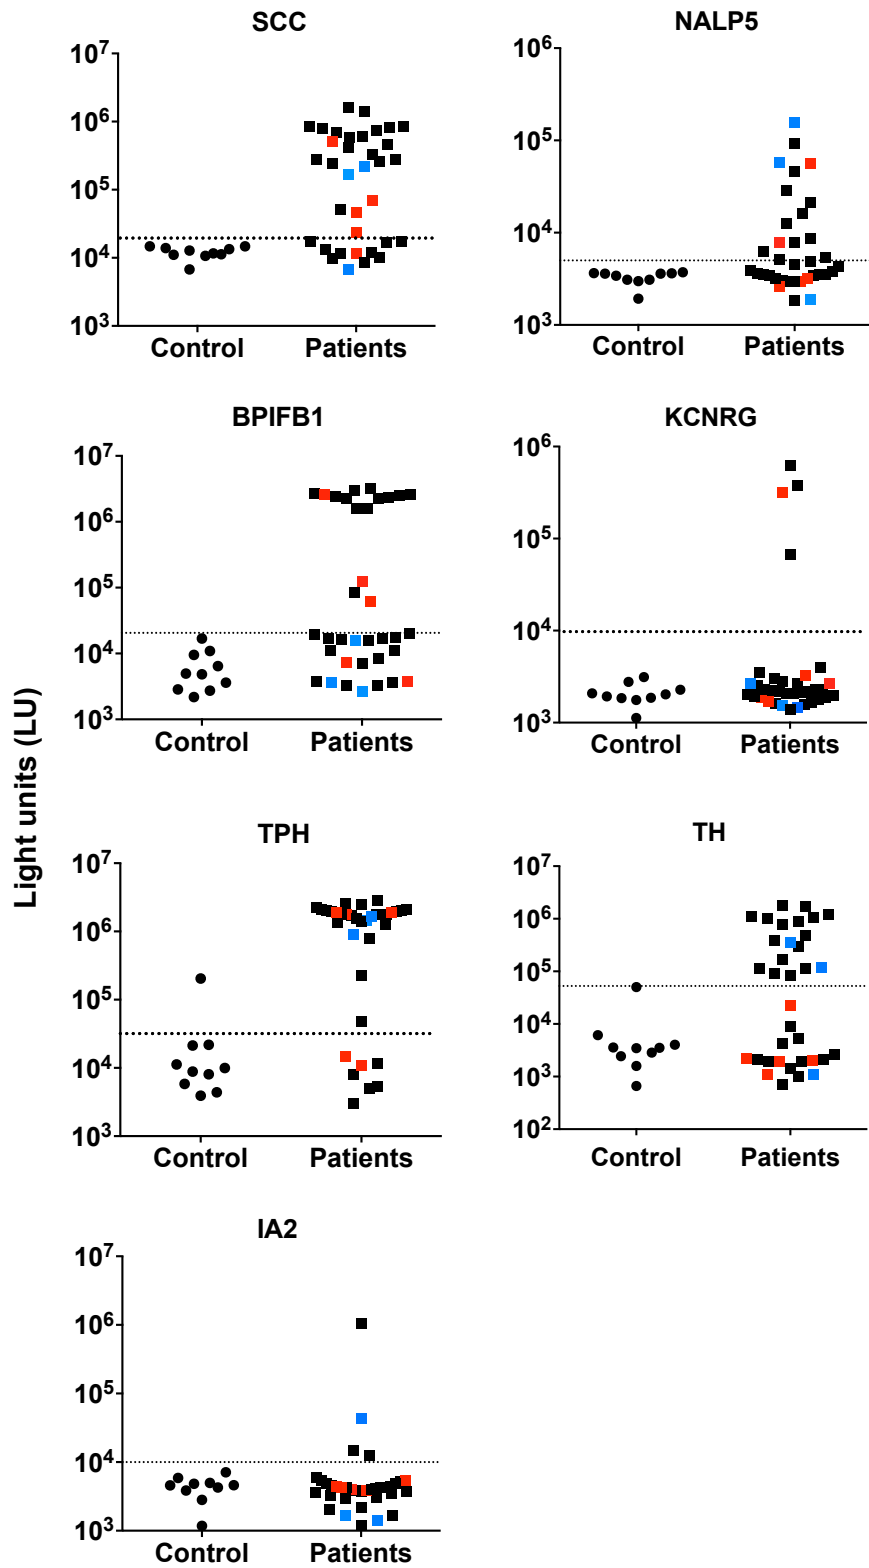

**Supplemental Figure 4. Autoantibody immunoreactivity against tissue autoantigens in the American Autoimmune polyendocrinopathy-Candidiasis-Ectodermal dystrophy (APECED) cohort.**

Shown is autoantibody immunoreactivity against the indicated autoantigens expressed as light units (LU) using the Luciferase immunoprecipitation systems (LIPS) immunoassay. The dotted line represents the cut-off value for determining seropositivity for the corresponding autoantibody. The 27 black squares correspond to the results obtained in the 27 APECED patients with biallelic *AIRE* mutations that include c.967\_979del13 in heterozygosity (n =17) or homozygosity (n = 10), the 5 red squares correspond to the results obtained in the 5 APECED patients without biallelic *AIRE* mutations, and the 3 blue squares correspond to the results obtained in the 3 APECED patients with biallelic *AIRE* mutations other than c.967\_979del13. SCC, side-chain cleavage enzyme; NALP5, NLR family and pyrin domain containing 5; BPIFB1, bactericidal/permeability-increasing fold-containing B1; KCNRG, potassium channel regulator; TPH, tryptophan hydroxylase; TH, tyrosine hydroxylase; IA-2, tyrosine phosphatase-related islet antigen 2. n=35 patients; 10 healthy donors.

## Supplemental Figure 5

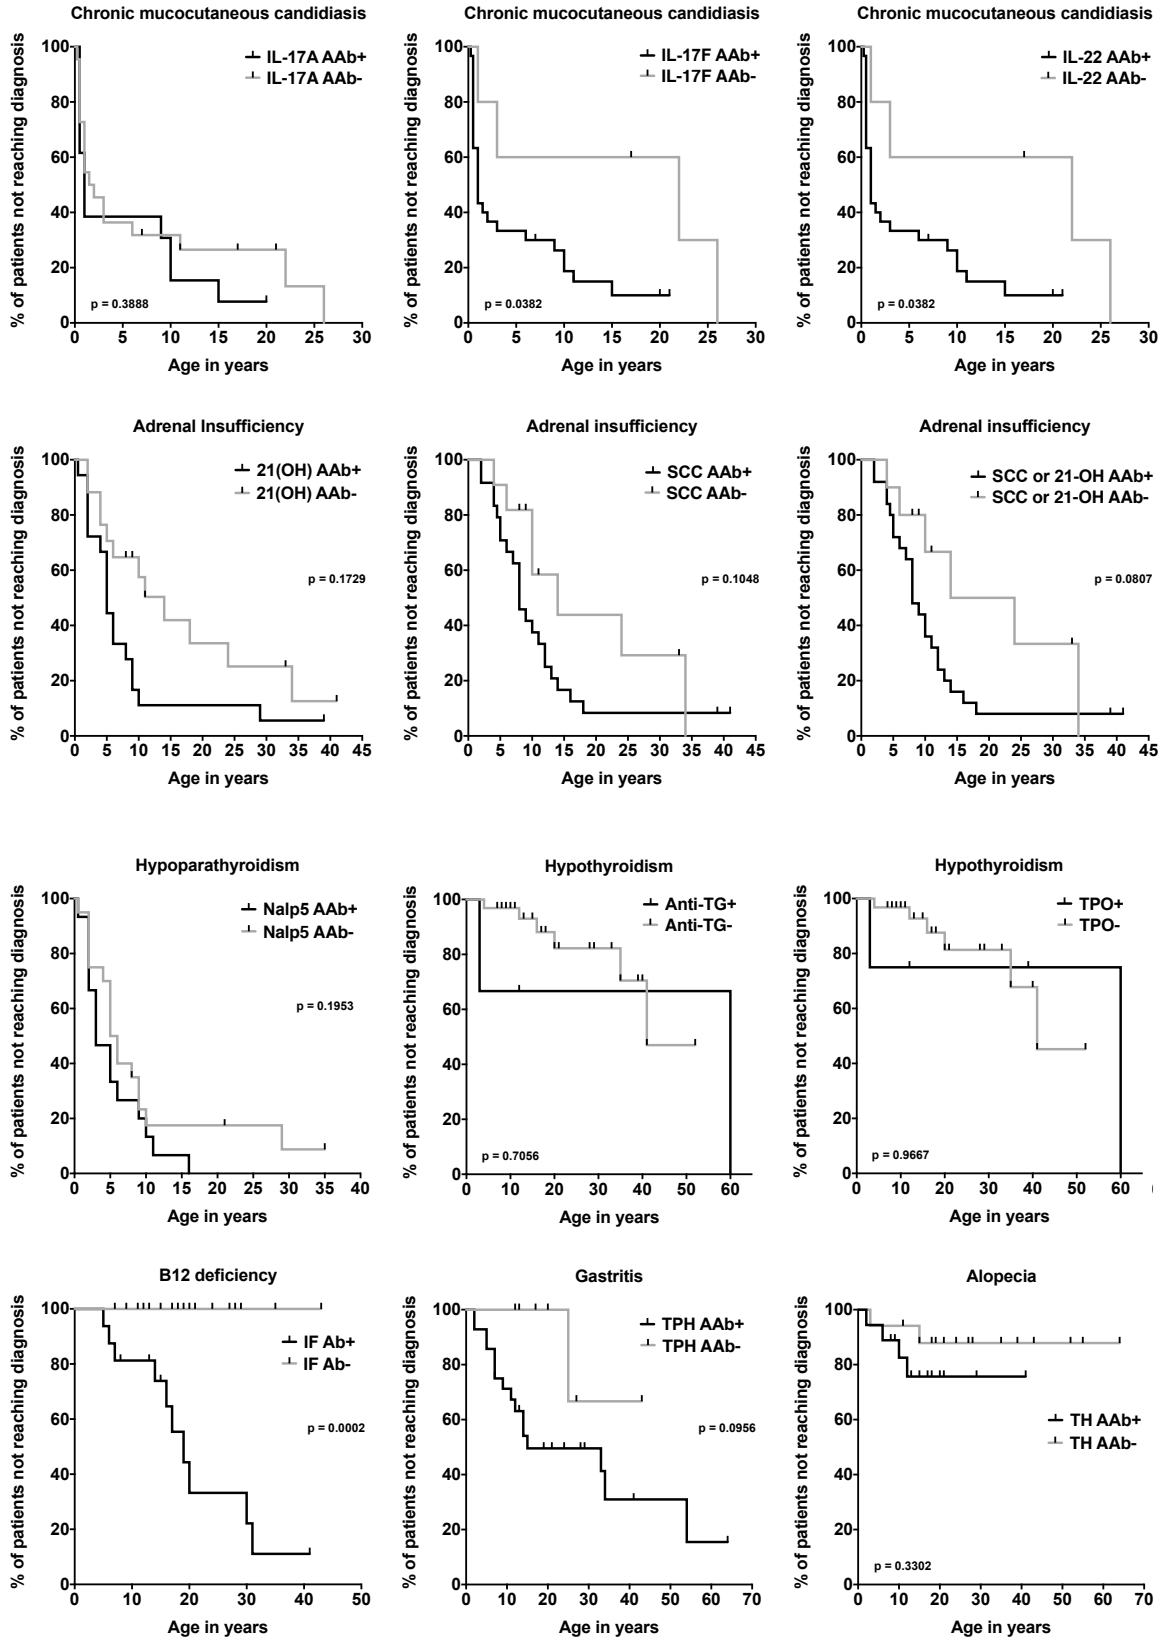

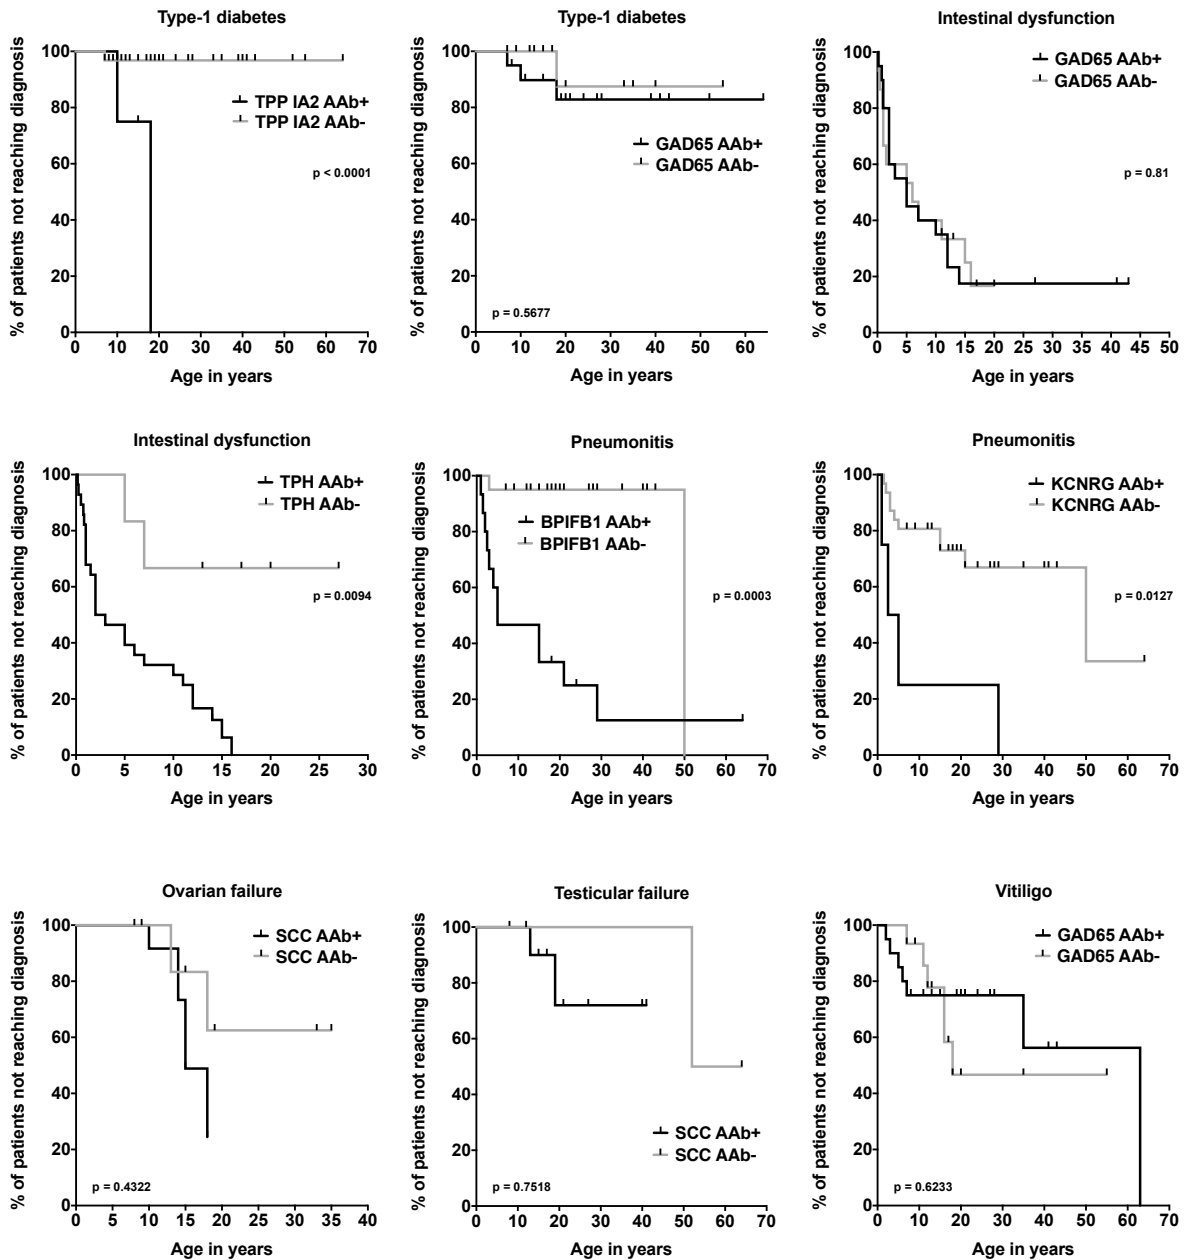

**Supplemental Figure 5. Correlation between autoantibody immunoreactivity and the time to development of the corresponding clinical manifestations in the American Autoimmune polyendocrinopathy-Candidiasis-Ectodermal dystrophy (APECED) patients.** Shown are Kaplan-Meier curves illustrating the correlation between the time to development of the indicated clinical manifestations with the presence or absence of the corresponding

autoantibodies. AAB, autoantibody; NALP5, NLR family and pyrin domain containing 5; 21-OH, 21-hydroxylase; SCC, side-chain cleavage enzyme; TPO, thyroid peroxidase; TG, thyroglobulin; GAD65, glutamic acid decarboxylase 65; IA-2, tyrosine phosphatase-related islet antigen 2; TH, tyrosine hydroxylase; TPH, tryptophan hydroxylase; BPIFB1, bactericidal/permeability-increasing fold-containing B1; KCNRG, potassium channel regulator; IF, intrinsic factor.

# Supplemental Figure 6

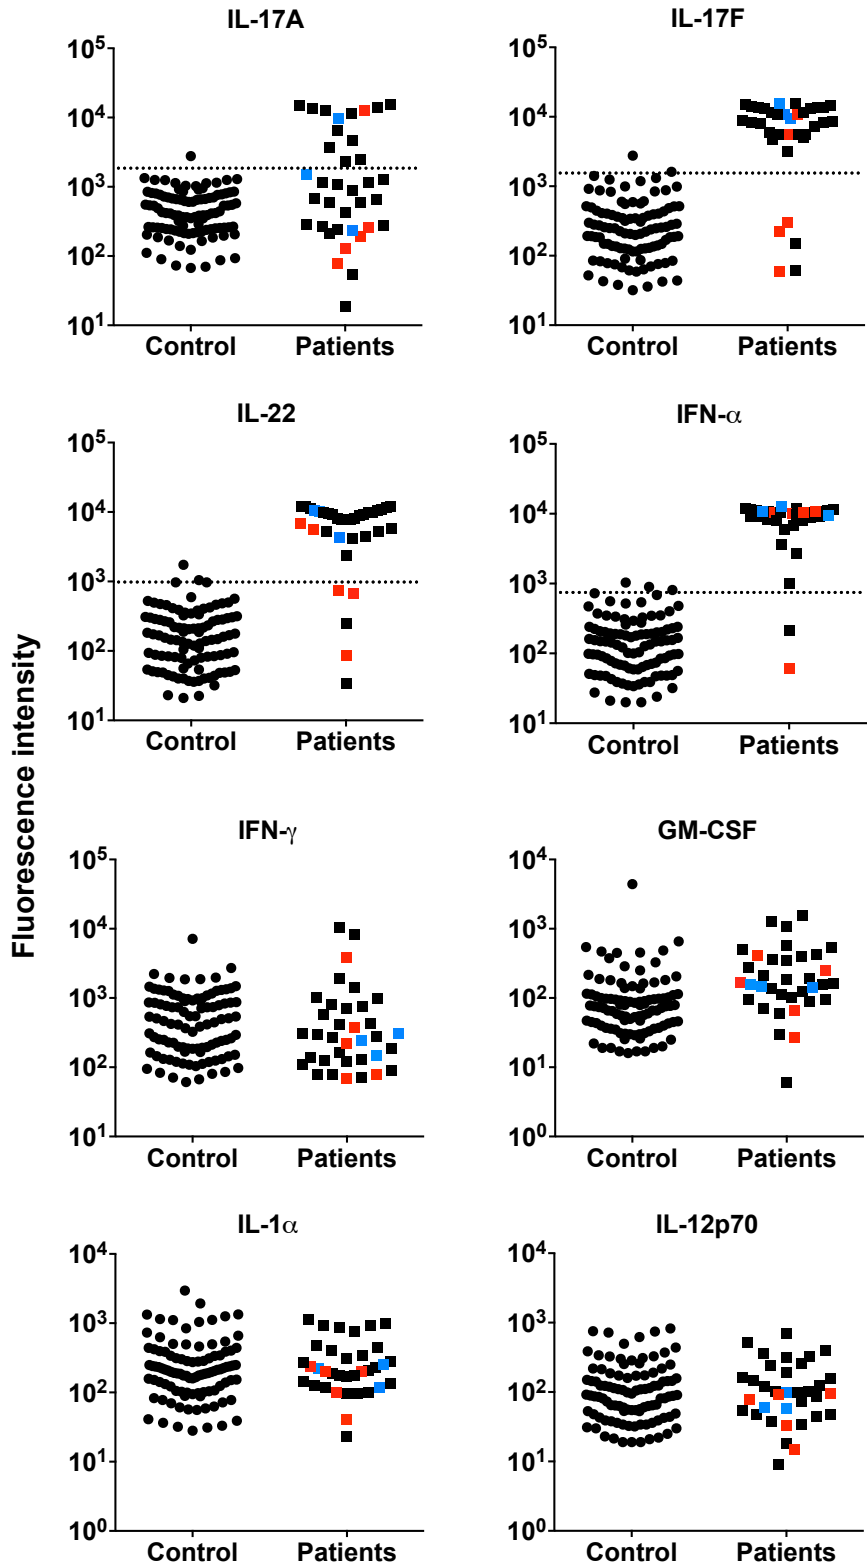

**Supplemental Figure 6. Anti-cytokine autoantibody immunoreactivity in the American Autoimmune polyendocrinopathy-Candidiasis-Ectodermal dystrophy (APECED) cohort.**

Shown is autoantibody immunoreactivity against the indicated cytokines expressed as fluorescence intensity using a particle-based multiplex assay. The dotted line represents the cut-off value for determining seropositivity for the corresponding autoantibody. The 27 black squares correspond to the results obtained in the 27 APECED patients with biallelic *AIRE* mutations that include c.967\_979del13 in heterozygosity (n =17) or homozygosity (n = 10), the 5 red squares correspond to the results obtained in the 5 APECED patients without biallelic *AIRE* mutations, and the 3 blue squares correspond to the results obtained in the 3 APECED patients with biallelic *AIRE* mutations other than c.967\_979del13. n=35 patients; 100 healthy donors.

# Supplemental Figure 7

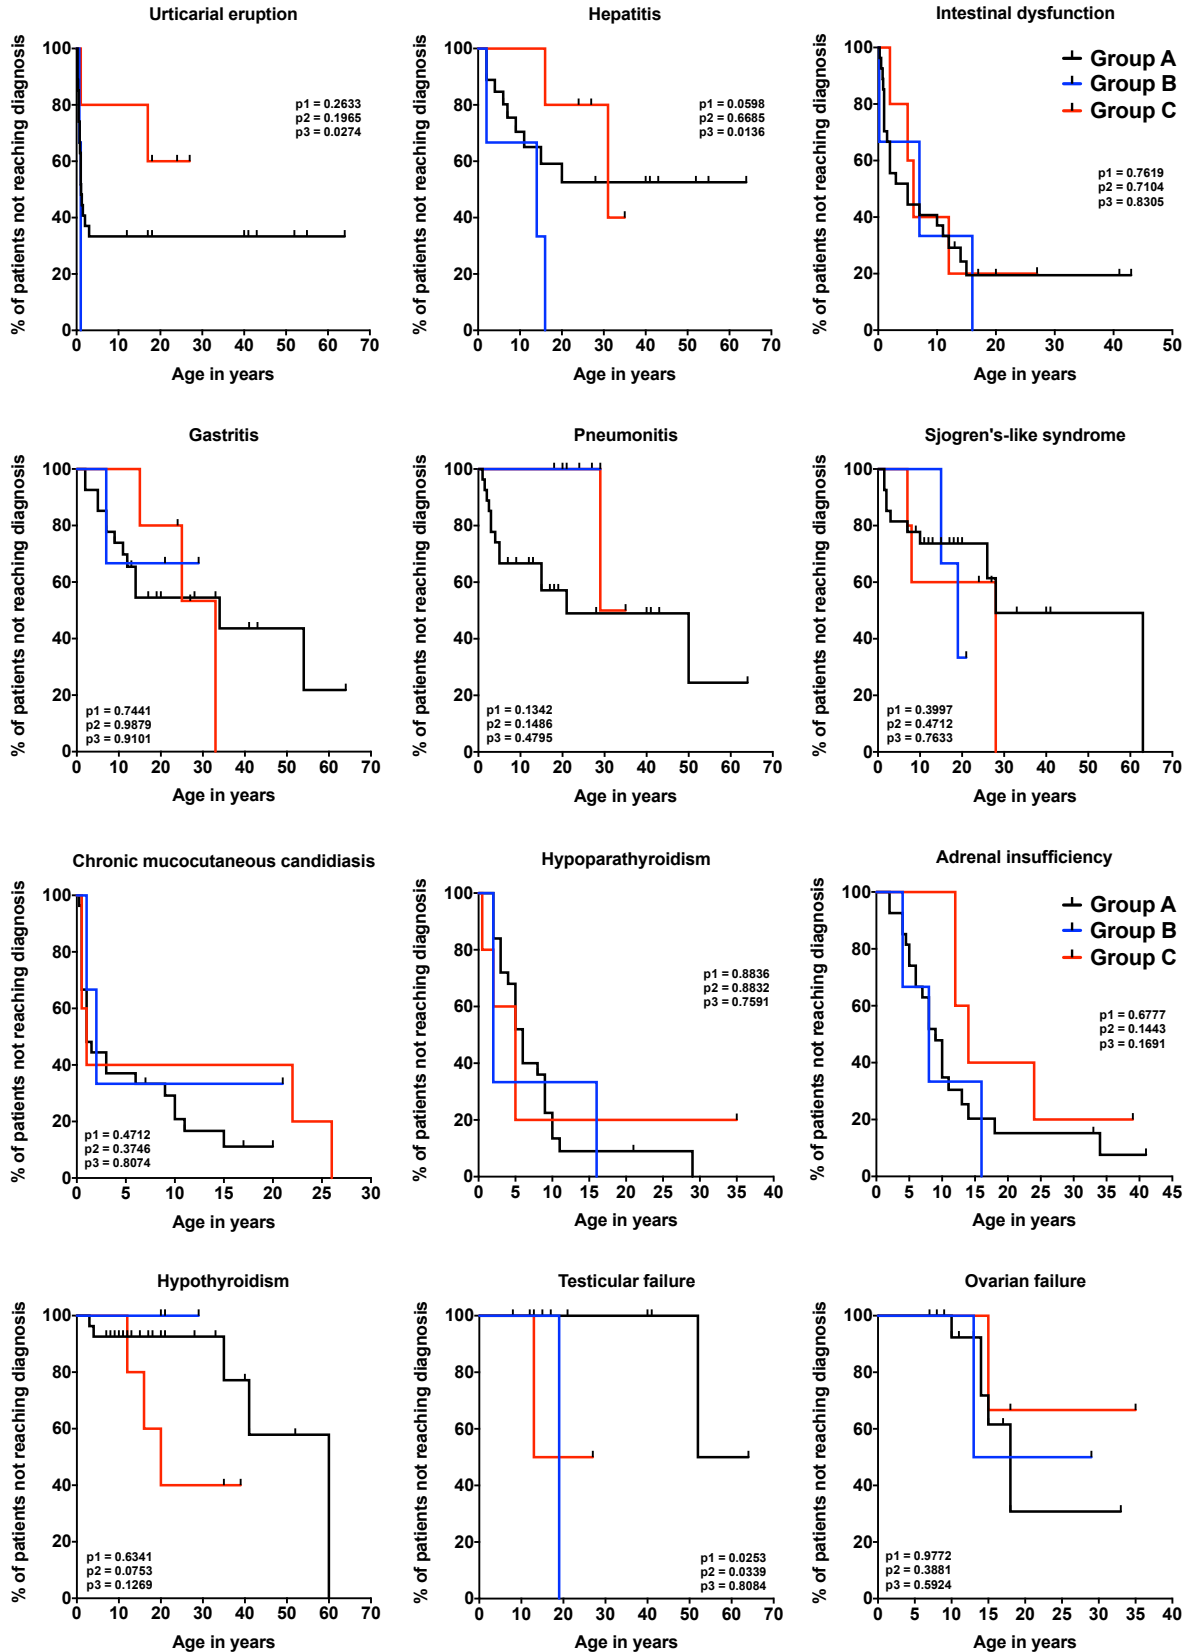

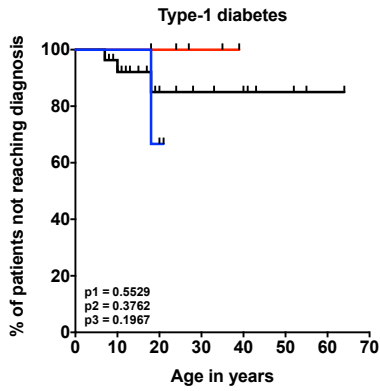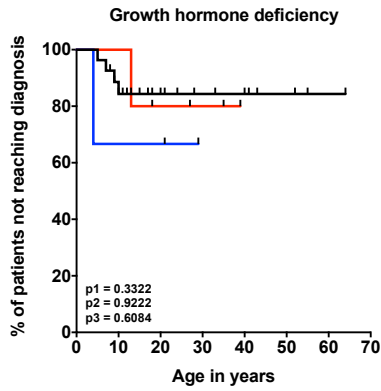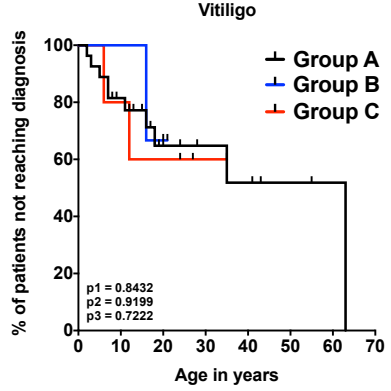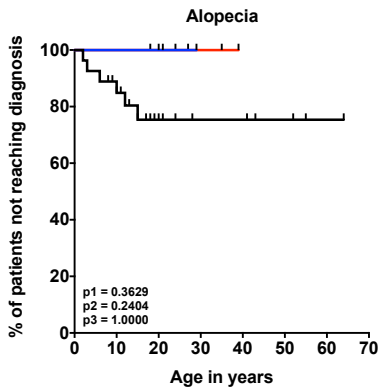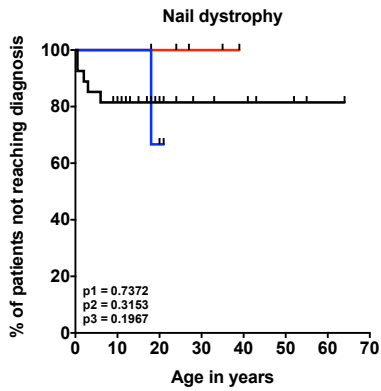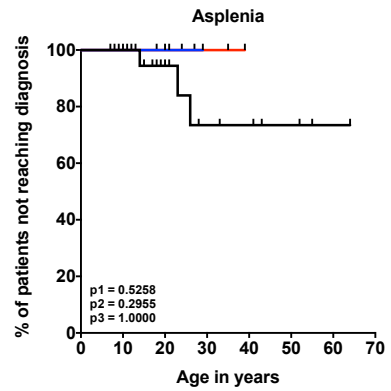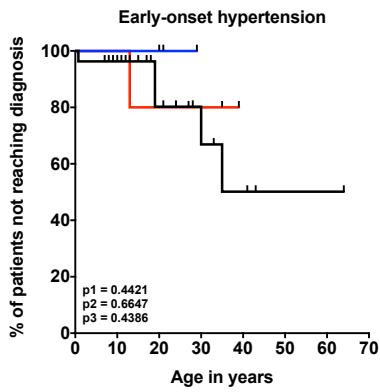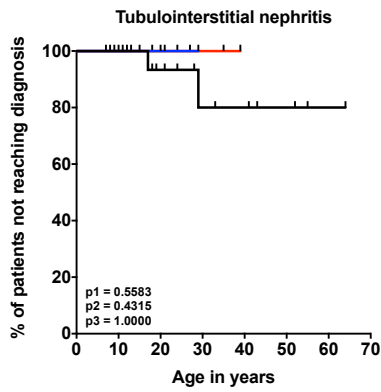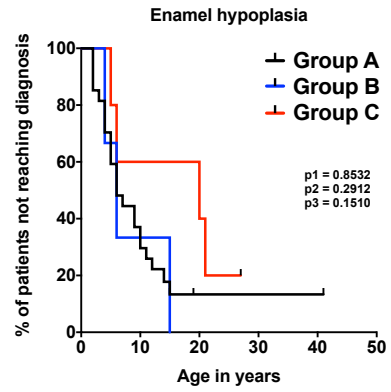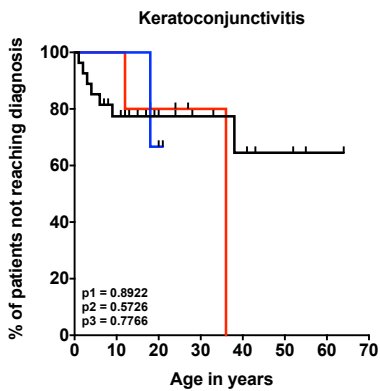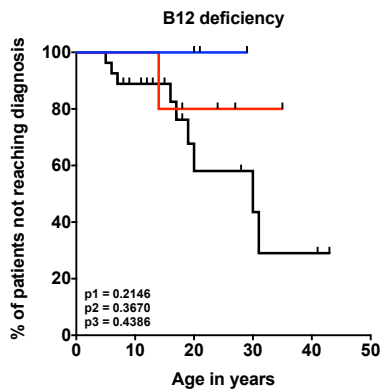

**Supplemental Figure 7. Correlation between carriage of different *AIRE* mutations and the time to development of clinical manifestations in American Autoimmune polyendocrinopathy-Candidiasis-Ectodermal dystrophy (APECED) patients.** Shown are Kaplan-Meier curves illustrating the correlation between carrying biallelic *AIRE* mutations that include c.967\_979del13 in heterozygosity or homozygosity (Group A), or carrying biallelic *AIRE* mutations other than c.967\_979del13 (Group B) or carrying no biallelic *AIRE* mutations (Group C) and the time to development of the 23 clinical manifestations. P1 corresponds to the *P* value that compares Group A with Group B, P2 corresponds to the *P* value that compares Group A with Group C, and P3 corresponds to the *P* value that compares Group B with Group C.

## Supplemental Figure 8

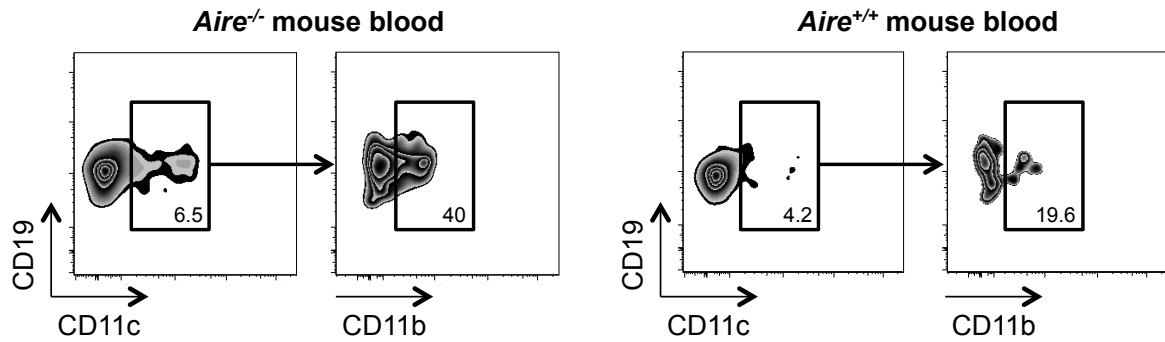

**Supplemental Figure 8. Gating strategy and representative FACS plots of CD11c<sup>+</sup>CD11b<sup>+</sup> B cells in mouse peripheral blood.** After initial FSC/SCC gating of peripheral blood cells (not shown), live CD45<sup>+</sup>CD3<sup>-</sup>NKp46<sup>-</sup>CD19<sup>+</sup> B cells were selected (not shown) and CD11c<sup>+</sup>CD11b<sup>+</sup> B cells were delineated. Shown are representative FACS plots of CD11c<sup>+</sup>CD11b<sup>+</sup> B cells from *Aire*<sup>-/-</sup> (left panels) and *Aire*<sup>+/+</sup> mice (right panels), which show enrichment of these cells in Aire-deficient mouse peripheral blood.
